# Supplementary material for: Early warning signals have limited applicability to empirical lake data
Source: Springer Nature journal article supplement (doi:10.1038/s41467-023-43744-8), 2023-12-01
Supplement: 41467_2023_43744_MOESM1_ESM.pdf [file 41467_2023_43744_MOESM1_ESM.pdf]

## Supplementary Information: Early warning signals have limited applicability to empirical lake data.

Duncan A. O'Brien <sup>a\*</sup>, Smita Deb <sup>b</sup>, Gideon Gal <sup>c</sup>, Stephen J. Thackeray <sup>d</sup>, Partha S. Dutta <sup>b</sup>, Shin-ichiro S. Matsuzaki <sup>e</sup>, Linda May <sup>f</sup>, Christopher F. Clements <sup>a</sup>

<sup>a</sup> School of Biological Sciences, University of Bristol, Bristol, BS8 1TQ, UK

<sup>b</sup> Department of Mathematics, Indian Institute of Technology Ropar, Rupnagar, Punjab 140001, India

<sup>c</sup> Kinneret Limnological Laboratory, Israel Oceanographic & Limnological Research, PO Box 447, Migdal, Israel

<sup>d</sup> Lake Ecosystems Group, UK Centre for Ecology & Hydrology, Bailrigg, Lancaster, UK

<sup>e</sup> Biodiversity Division, National Institute for Environmental Studies, 16-2 Onogawa, Tsukuba, Ibaraki, 305-8506, Japan

<sup>f</sup> UK Centre for Ecology & Hydrology, Bush Estate, Penicuik, Midlothian EH26 0QB, UK

\* Duncan A. O'Brien

**Email:** duncan.a.obrien@gmail.com

### Contents

Figure S1: Lake regime shift classification using threshold generalised additive models and kernel densities.

Figure S2-S7: Posterior parameter estimates and diagnostic chain trace plots for Bayesian models.

Figure S8-S10: Diagnostic posterior predictive checks for Bayesian models.

Table S1: Lake breakpoints and bimodality identified by Figure S1.

Table S2: Description of early warning signal indicators used.

Table S3-S7: Model summary tables for the estimated improvement of data pre-processing on early warning signal ability in critically transitioning time series.

Table S8-S9: Model summary tables for early warning signal computation technique ability (i.e. univariate vs multivariate, rolling vs expanding windows) in yearly and monthly data.

Table S10-S11: Model summary tables for individual early warning signal indicator ability (in yearly and monthly data) in predicting critical transitions.

Table S12-S13: Model summary tables for individual early warning signal indicator ability (in yearly and monthly data) in predicting non-critically transitioning time series.

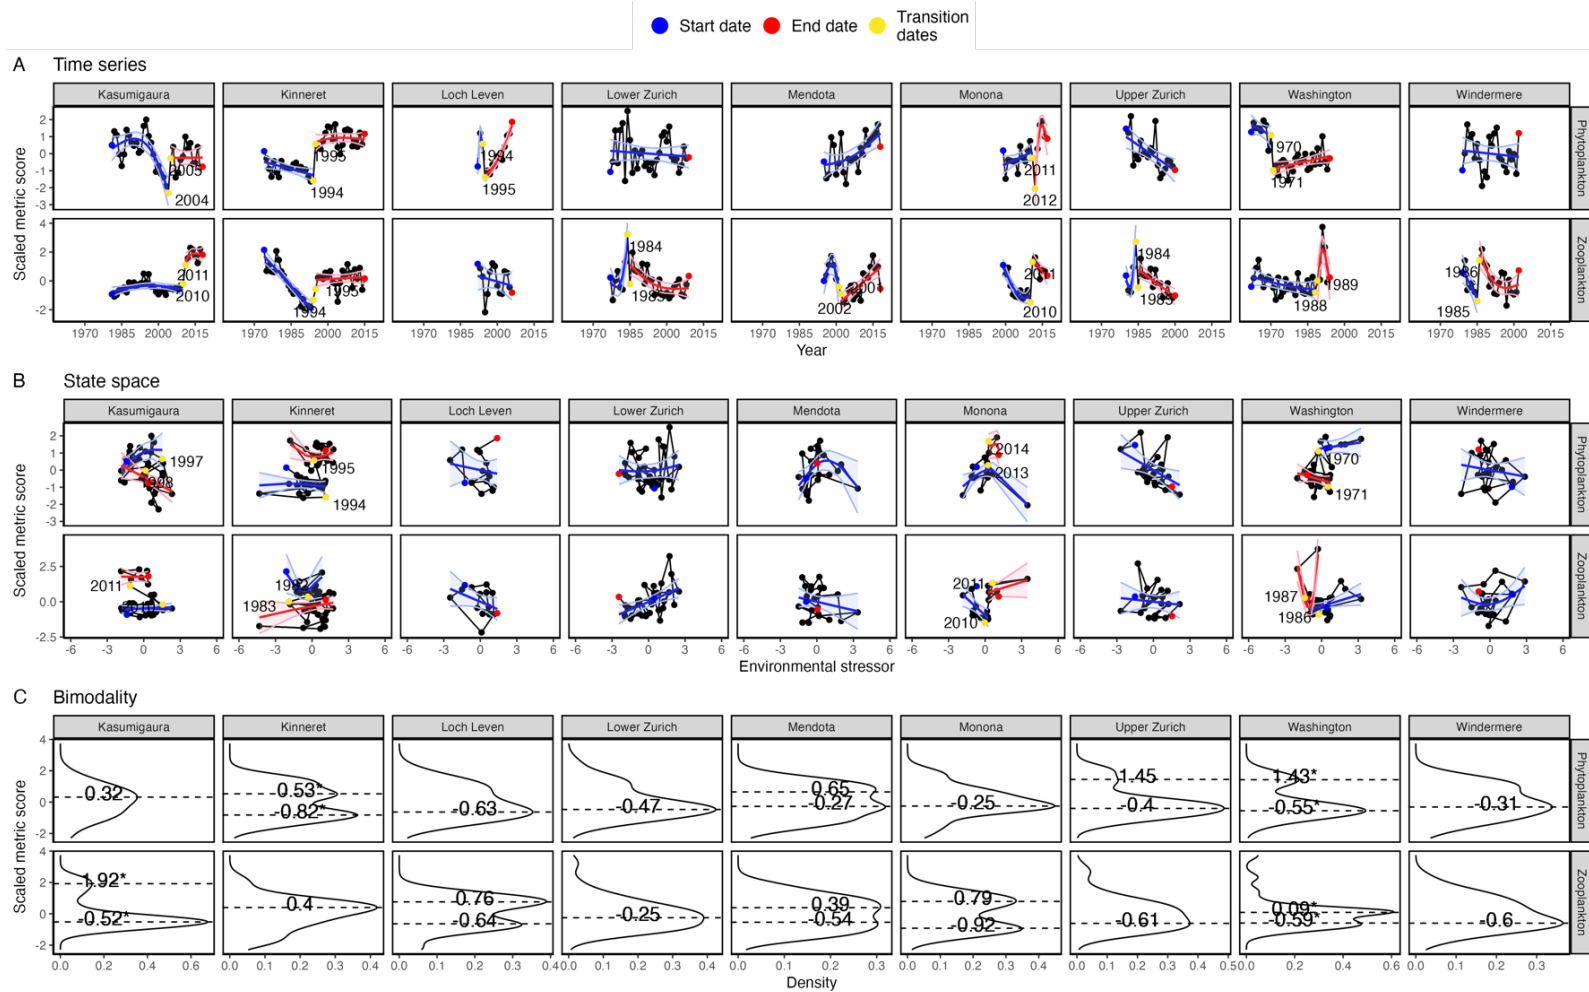

**Figure. S1.** All threshold generalized additive model fits across lakes and trophic levels. Black points and lines represent the raw time series of plankton density in both the temporal and environmental state spaces. Start, end, and transition points are indicated by coloured points, with the dates of breakpoints also reported. Points represent the observed data, with curved lines and shaded regions the GAM fits and 95% confidence intervals respectively. Asterisks in the kernel density plot indicate significant bimodality coefficients, with dashed lines the estimated modalities. Plankton densities have been scaled to mean zero and unit variance to improve plotting clarity.

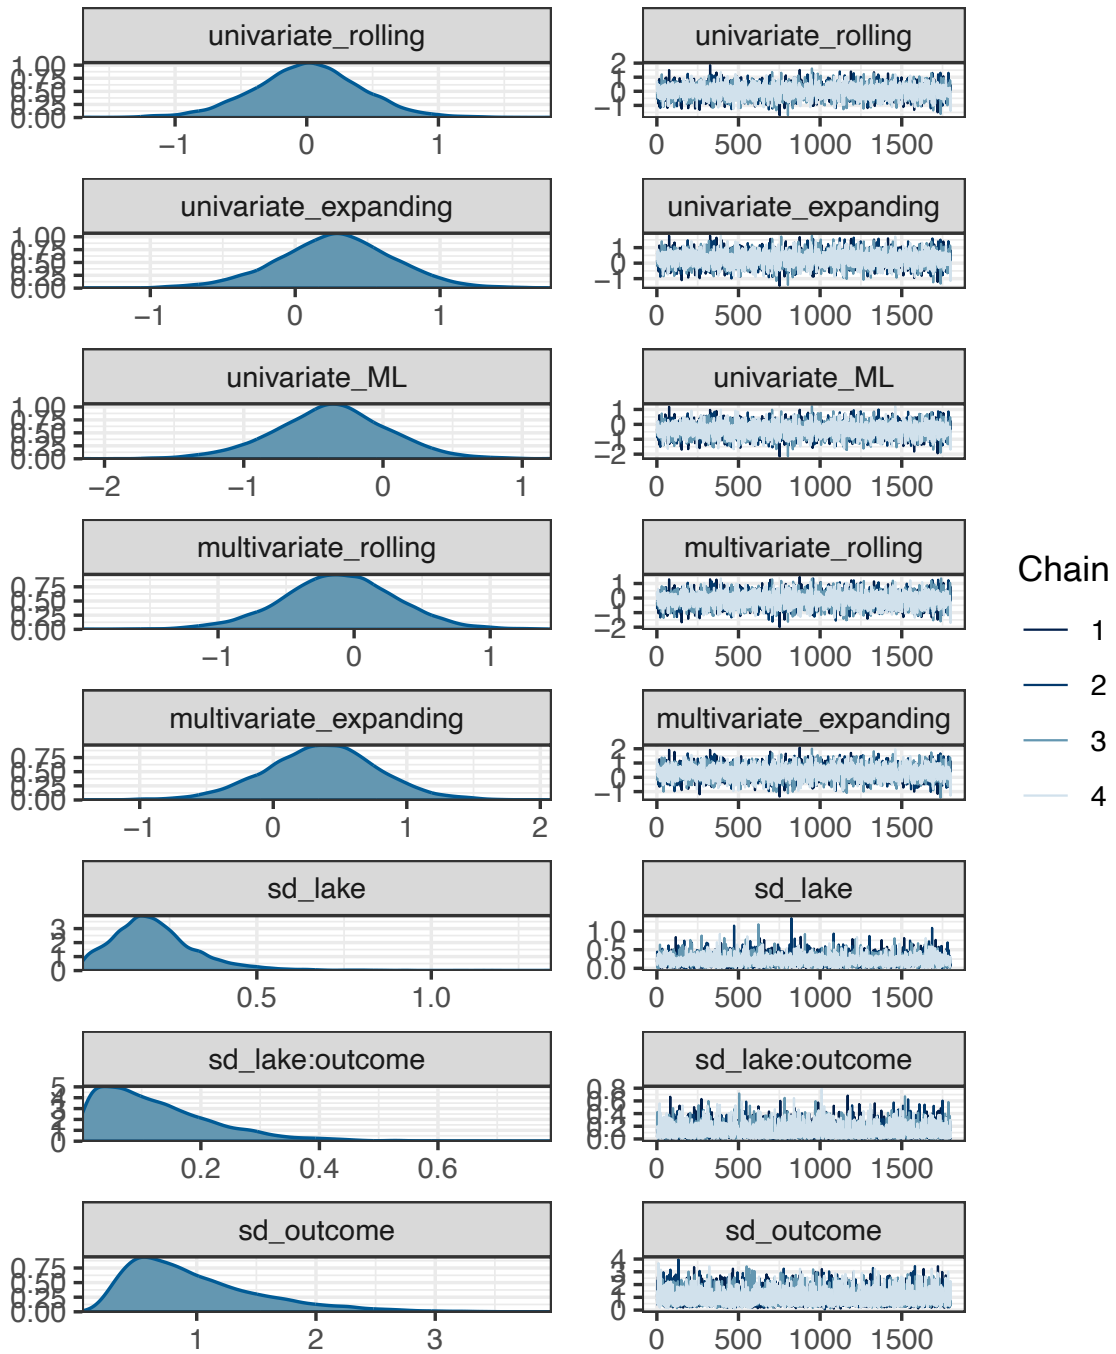

**Figure. S2.** Trace plots for each parameter of a hierarchical binomial Bayesian model fitted between early warning signal computation method and successful prediction of lake fate in monthly plankton data. Visually, a converged fit is indicated by unimodal density plots (left) and 'well-mixed'/highly overlapping chains (right).

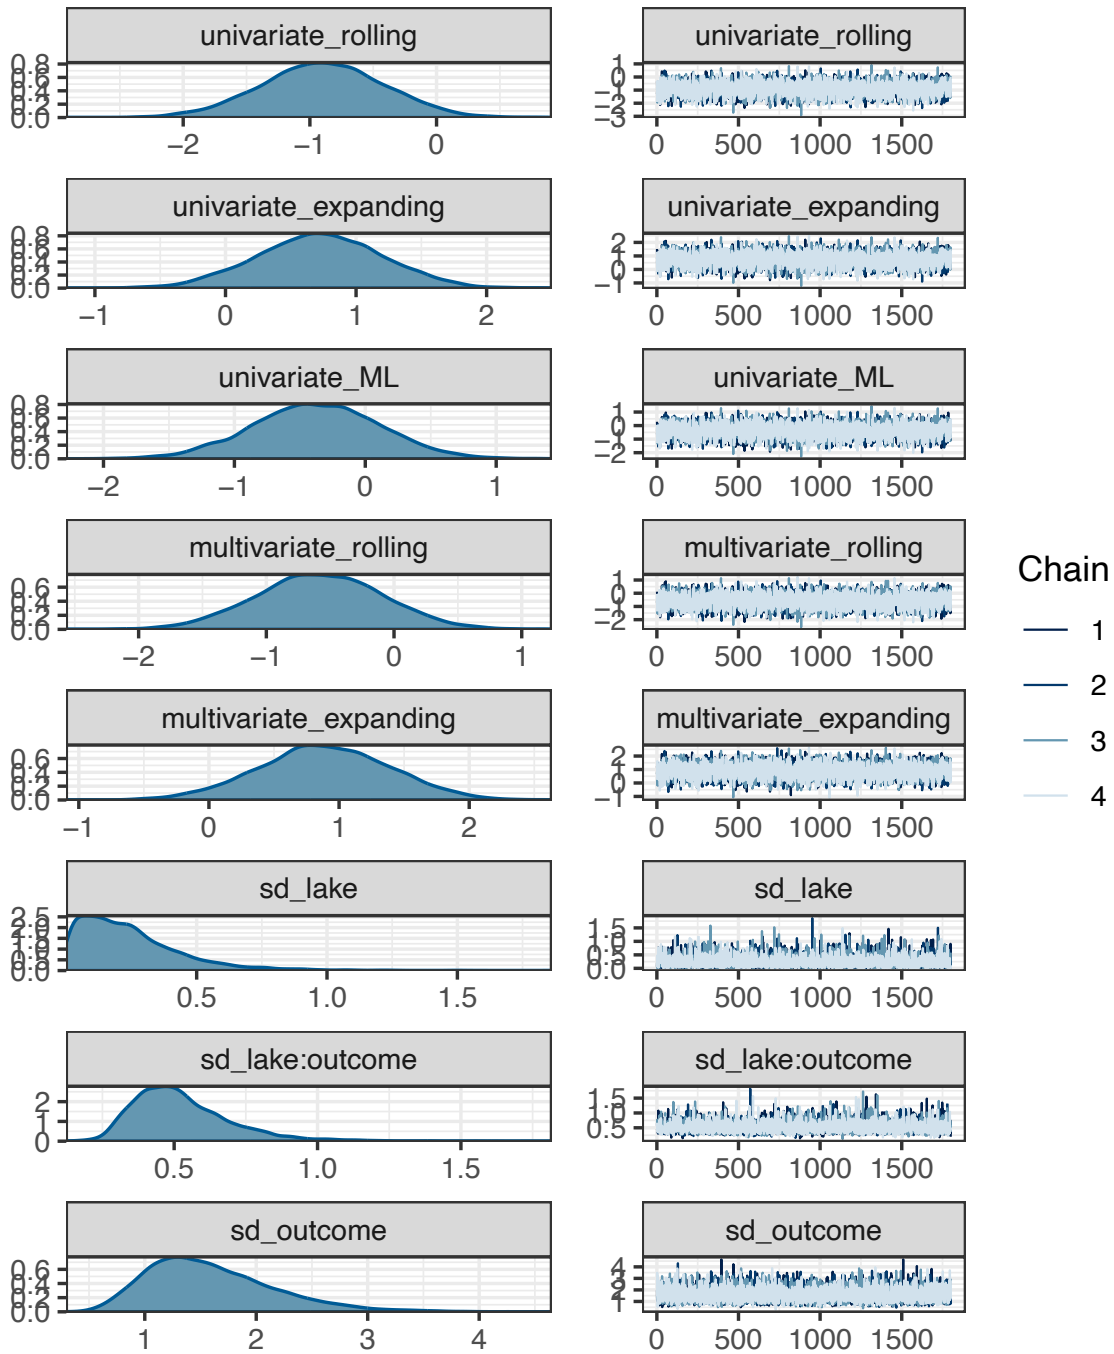

**Figure. S3.** Trace plots for each parameter of a hierarchical binomial Bayesian model fitted between early warning signal computation method and successful prediction of lake fate in yearly plankton data. Visually, a converged fit is indicated by unimodal density plots (left) and ‘well-mixed’/highly overlapping chains (right).

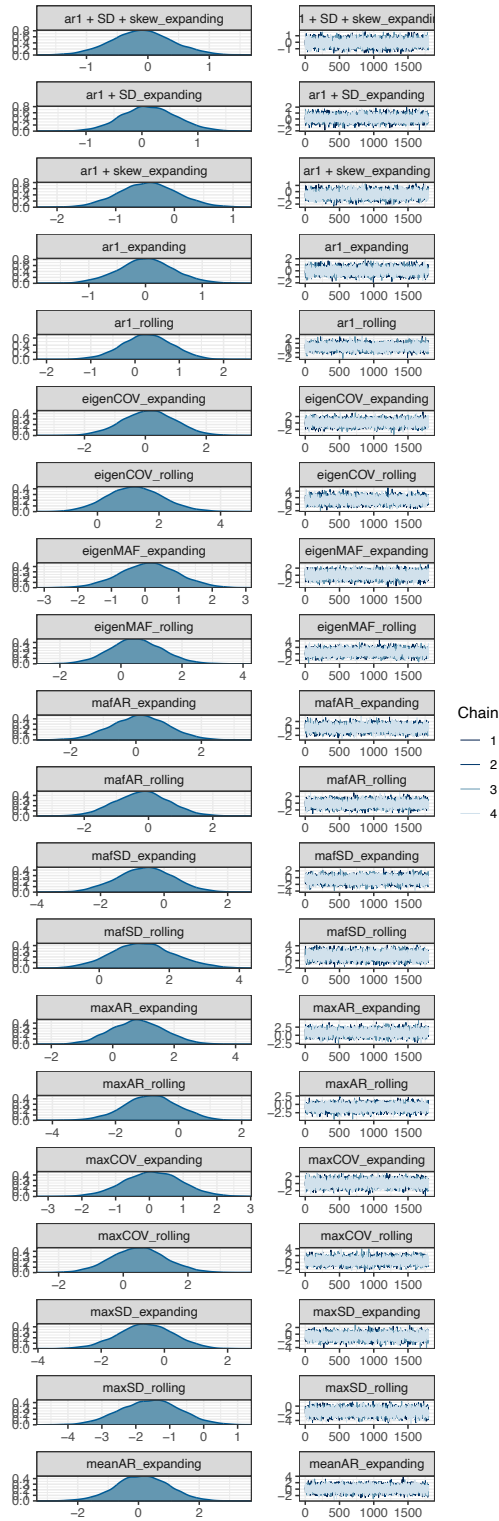

**Figure. S4.** Trace plots for each parameter of a hierarchical binomial Bayesian model fitted between early warning signal indicator and successful prediction of lake fate in transitioning monthly plankton data.

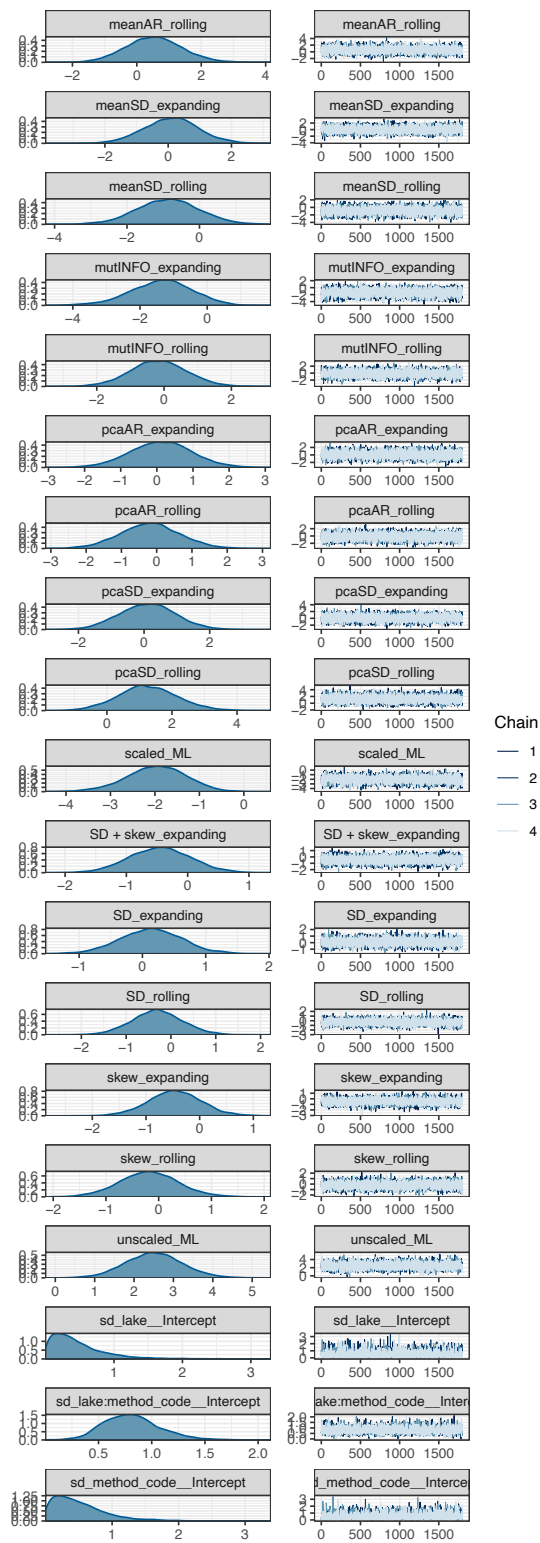

Figure. S4 cont.

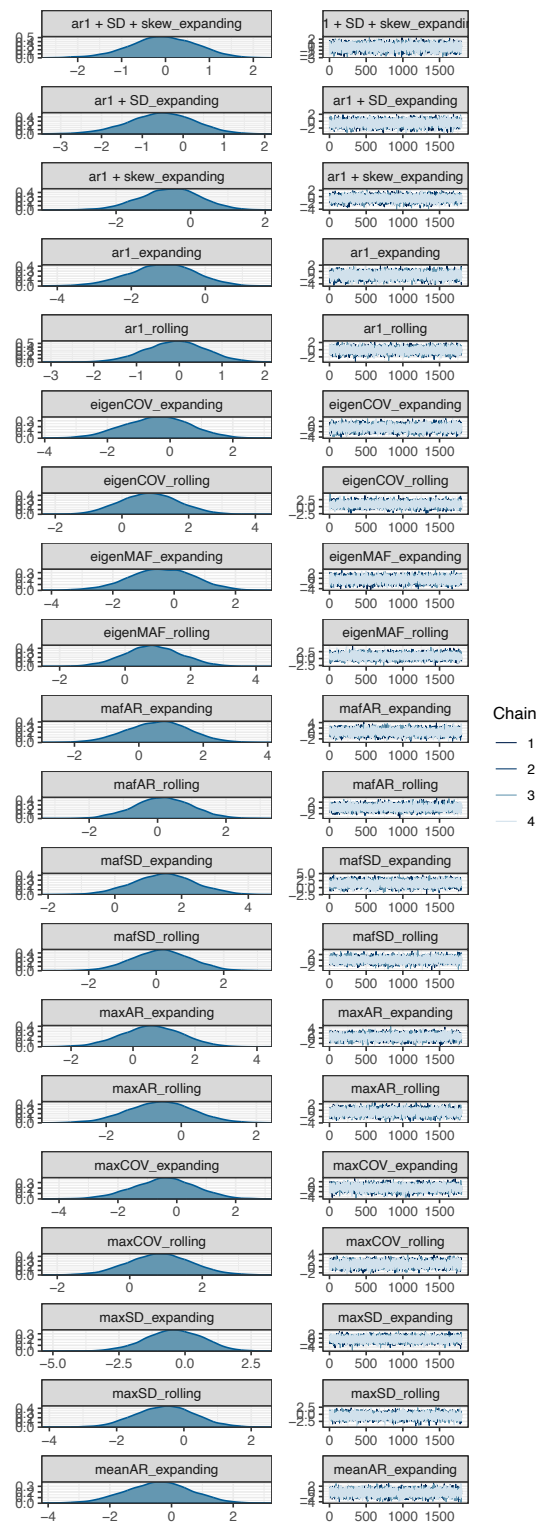

**Figure. S5.** Trace plots for each parameter of a hierarchical binomial Bayesian model fitted between early warning signal indicator and successful prediction of lake fate in transitioning yearly plankton data.

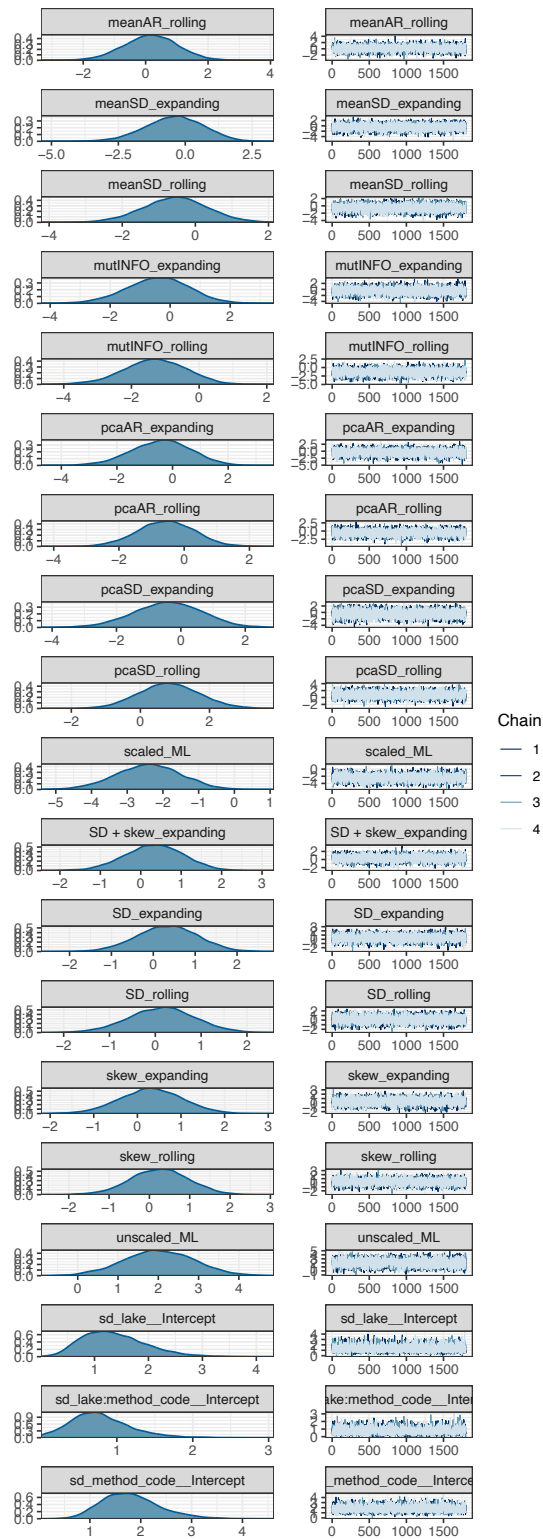

Figure. S5 cont.



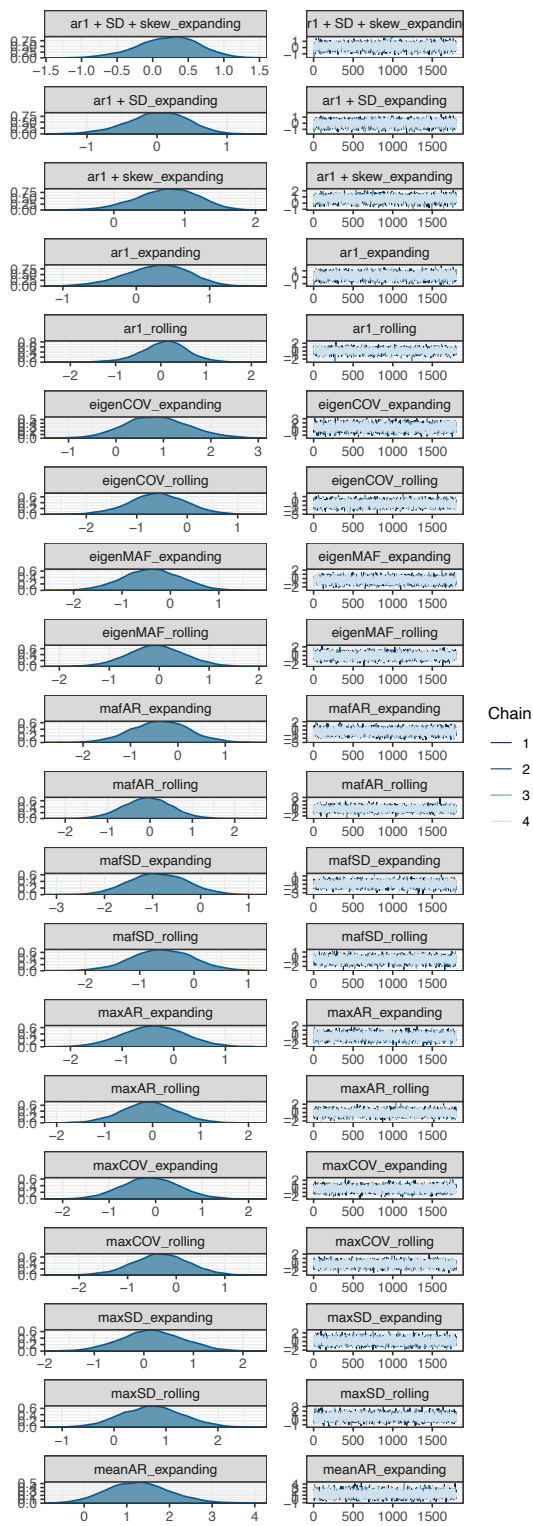

**Figure. S6.** Trace plots for each parameter of a hierarchical binomial Bayesian model fitted between early warning signal indicator and successful prediction of lake fate in non-transitioning monthly plankton data.

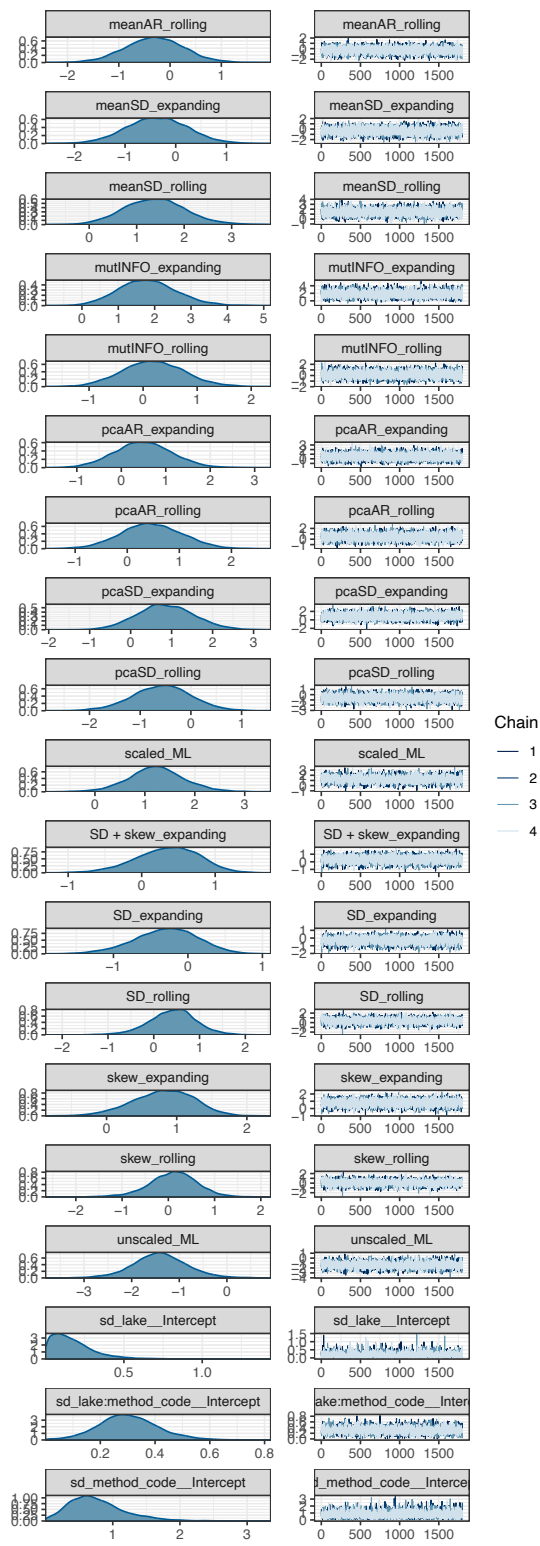

Figure. S6 cont.

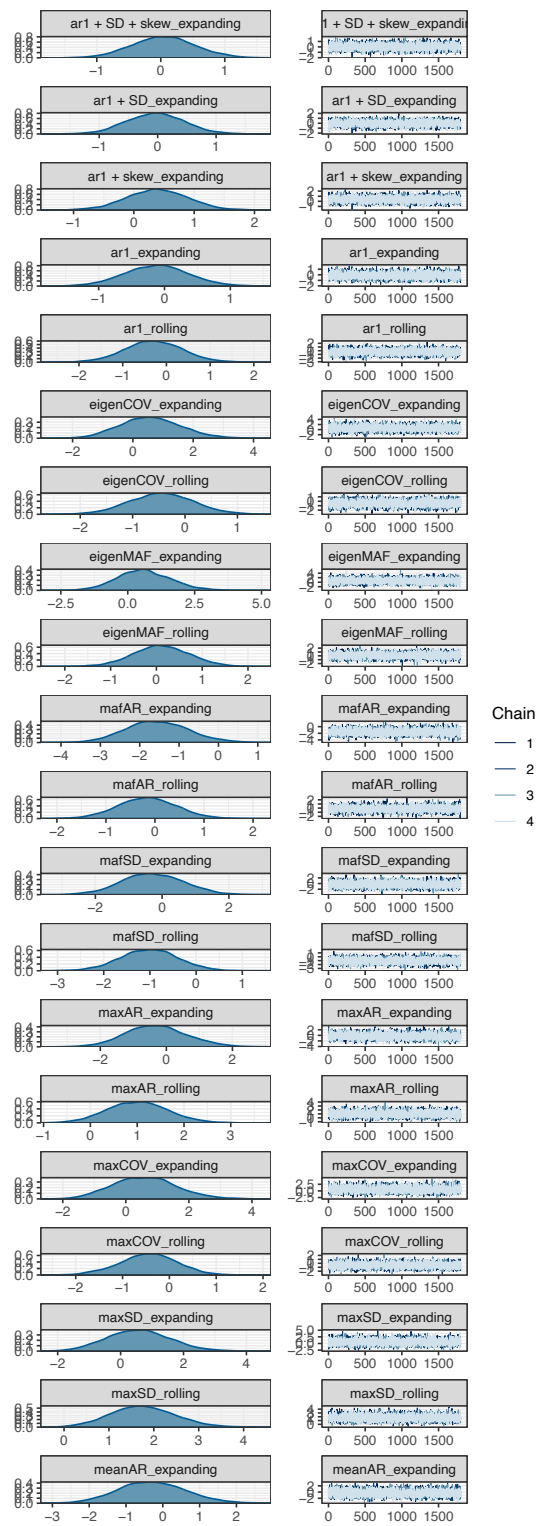

**Figure. S7.** Trace plots for each parameter of a hierarchical binomial Bayesian model fitted between early warning signal indicator and successful prediction of lake fate in non-transitioning yearly plankton data.

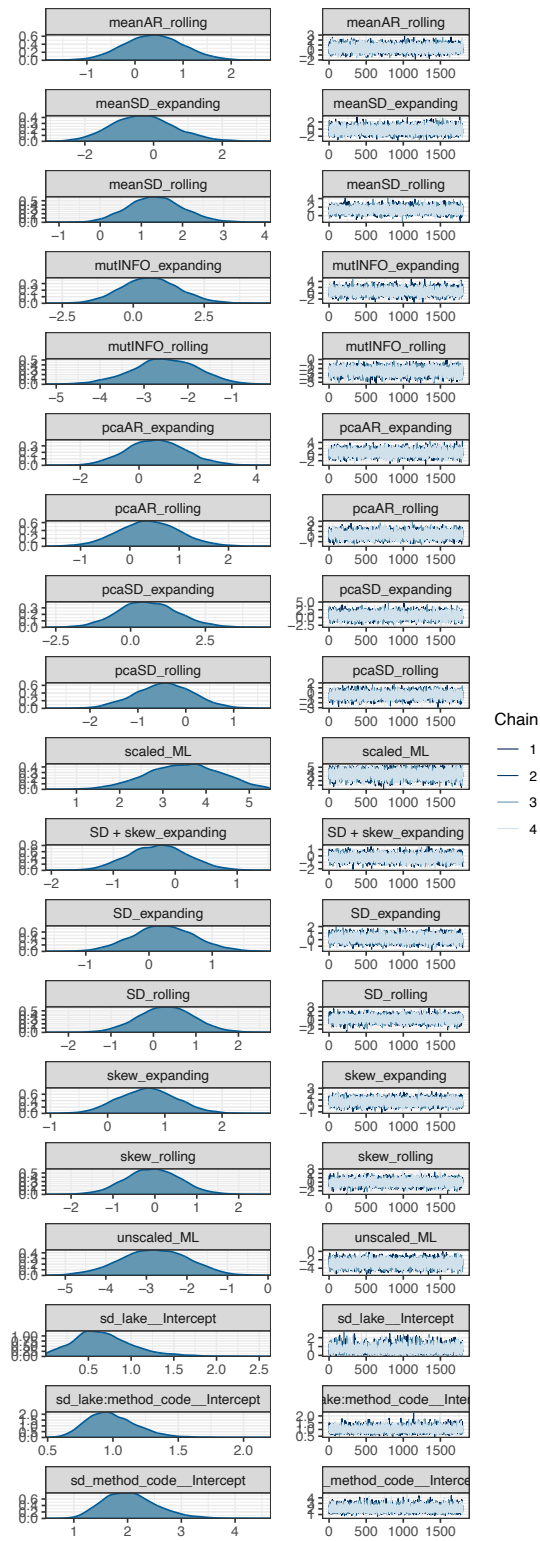

Figure. S7 cont.

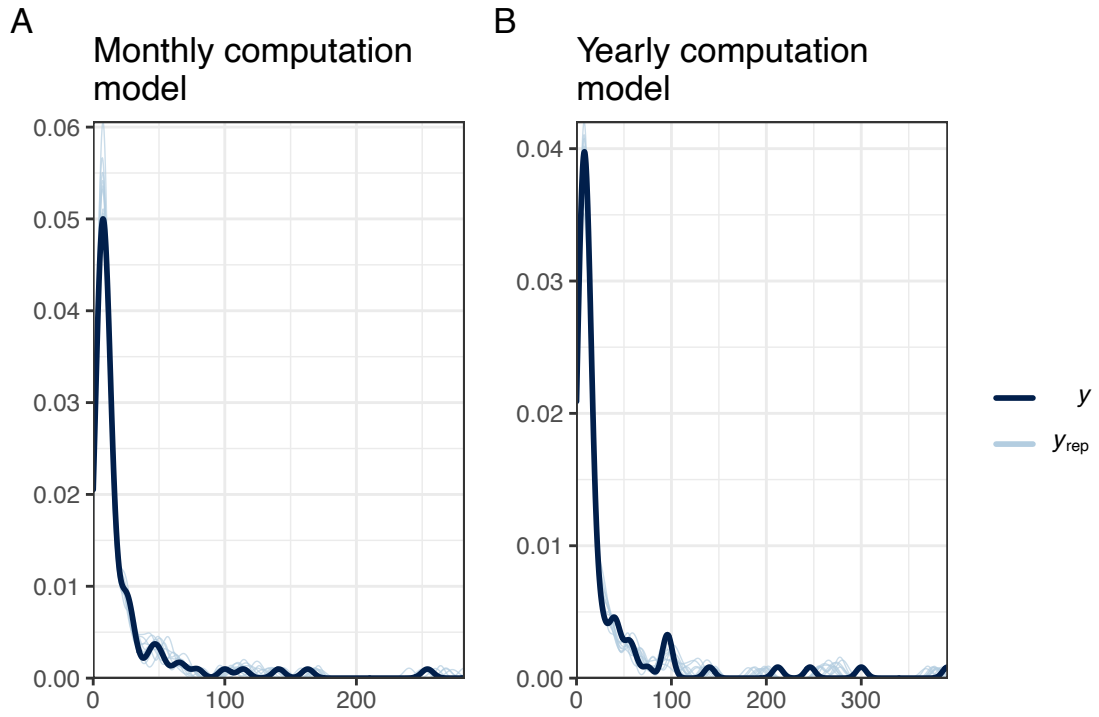

**Figure. S8.** Posterior predictive checks of hierarchical binomial Bayesian models fitted between early warning signal computation method and successful prediction in A) monthly and B) yearly plankton data. An appropriate fit occurs when  $y_{rep}$  reasonably reflects  $y$ .

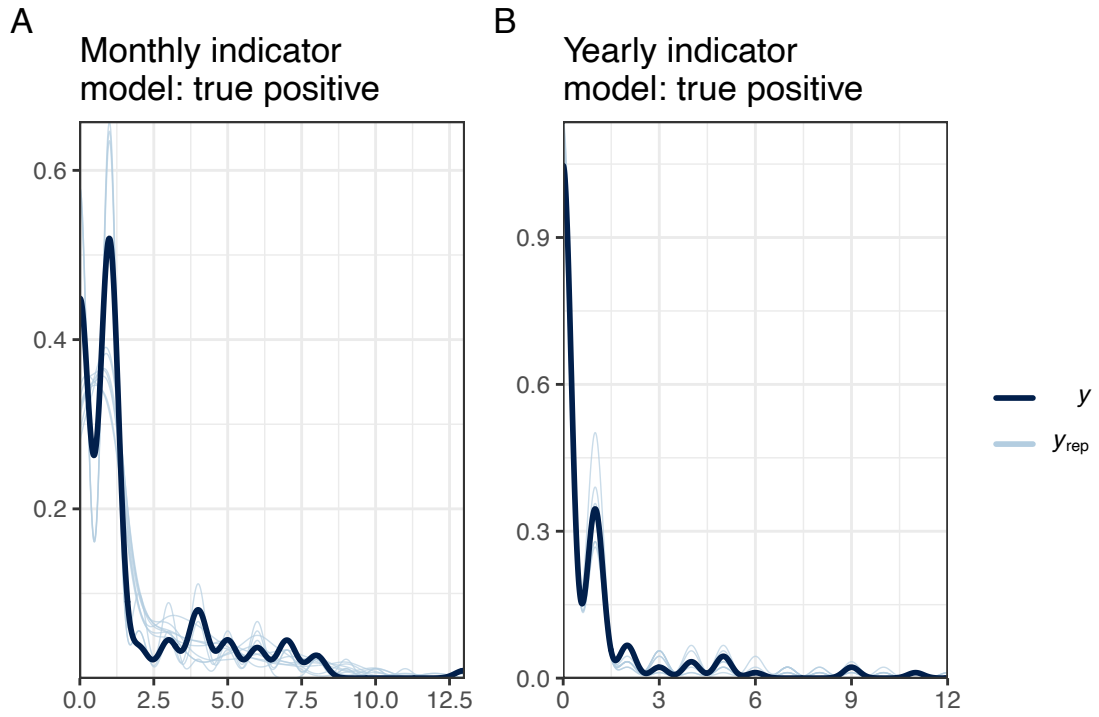

**Figure. S9.** Posterior predictive checks of hierarchical binomial Bayesian models fitted between early warning signal indicator and successful prediction in A) monthly and B) yearly transitioning plankton data. These models represent the true positive ability of each indicator. An appropriate fit occurs when  $y_{rep}$  reasonably reflects  $y$ .

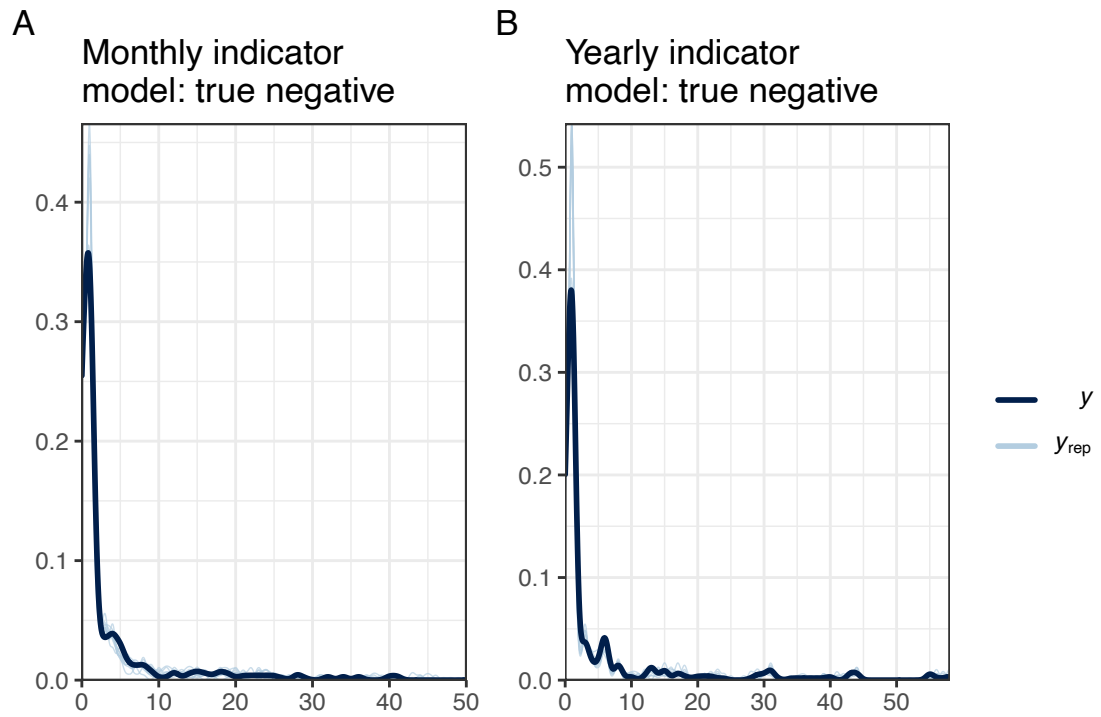

**Figure. S10.** Posterior predictive checks of hierarchical binomial Bayesian models fitted between early warning signal indicator and successful prediction in A) monthly and B) yearly non-transitioning plankton data. These models represent the true negative ability of each indicator. An appropriate fit occurs when  $y_{rep}$  reasonably reflects  $y$ .

**Table S1.** Breakpoints and critical transitions identified from threshold generalised additive models.

| Lake         | Trophic level | Explanatory variable | Breakpoint year | Bimodality detected | Critical transition identified |
|--------------|---------------|----------------------|-----------------|---------------------|--------------------------------|
| Kasumigaura  | Phytoplankton | Time                 | 2004            | No                  | No                             |
|              |               | Environment          | 1997            |                     |                                |
|              | Zooplankton   | Time                 | <b>2010</b>     | <b>Yes</b>          | <b>Yes</b>                     |
|              |               | Environment          | <b>2010</b>     |                     |                                |
| Kinneret     | Phytoplankton | Time                 | <b>1994</b>     | <b>Yes</b>          | <b>Yes</b>                     |
|              |               | Environment          | <b>1994</b>     |                     |                                |
|              | Zooplankton   | Time                 | 1982            | No                  | No                             |
|              |               | Environment          | 1994            |                     |                                |
| Loch Leven   | Phytoplankton | Time                 | 1994            | No                  | No                             |
|              |               | Environment          | NA              |                     |                                |
|              | Zooplankton   | Time                 | NA              | No                  | No                             |
|              |               | Environment          | NA              |                     |                                |
| Lower Zurich | Phytoplankton | Time                 | NA              | No                  | No                             |
|              |               | Environment          | NA              |                     |                                |
|              | Zooplankton   | Time                 | 1984            | No                  | No                             |
|              |               | Environment          | NA              |                     |                                |
| Mendota      | Phytoplankton | Time                 | NA              | No                  | No                             |
|              |               | Environment          | NA              |                     |                                |
|              | Zooplankton   | Time                 | 2001            | No                  | No                             |
|              |               | Environment          | NA              |                     |                                |
| Monona       | Phytoplankton | Time                 | 2011            | No                  | No                             |
|              |               | Environment          | 2013            |                     |                                |
|              | Zooplankton   | Time                 | <b>2010</b>     | <b>Yes</b>          | <b>Yes</b>                     |
|              |               | Environment          | <b>2010</b>     |                     |                                |
| Upper Zurich | Phytoplankton | Time                 | NA              | No                  | No                             |
|              |               | Environment          | NA              |                     |                                |
|              | Zooplankton   | Time                 | 1984            | No                  | No                             |
|              |               | Environment          | NA              |                     |                                |
| Washington   | Phytoplankton | Time                 | <b>1970</b>     | <b>Yes</b>          | <b>Yes</b>                     |
|              |               | Environment          | <b>1970</b>     |                     |                                |
|              | Zooplankton   | Time                 | 1988            | Yes                 | No                             |
|              |               | Environment          | 1986            |                     |                                |
| Windermere   | Phytoplankton | Time                 | NA              | No                  | No                             |
|              |               | Environment          | NA              |                     |                                |
|              | Zooplankton   | Time                 | 1985            | No                  | No                             |
|              |               | Environment          | NA              |                     |                                |



**Table S2.** Description of each individual early warning signal indicator and which variate category it belongs to.

| Early warning signal method | Indicator                                                | Description                                                                                                                                                                                       | Abbreviation                                     |
|-----------------------------|----------------------------------------------------------|---------------------------------------------------------------------------------------------------------------------------------------------------------------------------------------------------|--------------------------------------------------|
| Univariate                  | autocorrelation at lag-1                                 | The similarity between temporally adjacent data points – i.e. the correlation between the time series and the lagged version of itself.                                                           | ar1                                              |
|                             | variance                                                 | A measure of the degree of dispersion displayed in the time series. Is represented as the standard deviation here.                                                                                | SD                                               |
|                             | skewness                                                 | The degree of asymmetry in the distribution of values displayed in the time series.                                                                                                               | skew                                             |
|                             | composite of each combination of the above               | In the expanding window computation, the three above indicators can be standardised and combined to improve their reliability. Two and three indicator combinations were performed in this study. | ar1 + SD, ar1 + skew, SD + skew, ar1 + SD + skew |
| Multivariate                | mean autocorrelation at lag-1                            | Average autocorrelation across all time series representing the system.                                                                                                                           | meanAR                                           |
|                             | max autocorrelation at lag-1                             | The strongest autocorrelation of all time series representing the system.                                                                                                                         | maxAR                                            |
|                             | mean variance                                            | Average standard deviation across all time series representing the system.                                                                                                                        | meanSD                                           |
|                             | max variance                                             | The largest standard deviation of all time series representing the system.                                                                                                                        | maxSD                                            |
|                             | min/max autocorrelation factor (MAF) dominant eigenvalue | Following MAF dimension reduction of all representative time series, smallest scalar                                                                                                              | eigenMAF                                         |

|                  |                                                          |                                                                                                                                                                |          |
|------------------|----------------------------------------------------------|----------------------------------------------------------------------------------------------------------------------------------------------------------------|----------|
|                  |                                                          | of the resulting eigenvectors.                                                                                                                                 |          |
|                  | first MAF (MAF1) autocorrelation at lag-1                | The autocorrelation of the MAF axis that yields the strongest autocorrelation.                                                                                 | mafAR    |
|                  | MAF1 variance                                            | The standard deviation of the MAF axis that yields the strongest autocorrelation.                                                                              | mafSD    |
|                  | first principal component (PC1) autocorrelation at lag-1 | Following principal component analysis of all representative time series, the autocorrelation of the principal component which explains the greatest variance. | pcaAR    |
|                  | PC1 variance                                             | The standard deviation of the first principal component.                                                                                                       | pcaSD    |
|                  | dominant eigenvalue of the covariance matrix             | From the covariance matrix of all representative time series, the largest eigenvalue is informative.                                                           | eigenCOV |
|                  | maximum covariance                                       | The strongest covariance between all representative time series.                                                                                               | maxCOV   |
|                  | mutual information                                       | The degree of information gained from one time series on the state of another. Is averaged across all pairwise time series comparisons.                        | mutINFO  |
| Machine learning | EWSNet scaled weights                                    | Calls the scaled forms of the EWSNet model weights (scaled between 1-2) and conceptually should be robust regardless of the data's magnitude.                  | scaled   |
|                  | EWSNet unscaled weights                                  | Calls the unscaled forms of the EWSNet model weights.                                                                                                          | unscaled |

**Table S3.** Coefficient estimates for influence of each data pre-processing technique on rolling window univariate early warning signal classification ability relative to assessments made on the raw data. Each estimate is therefore the relative improvement of that factor level versus the none-none data pre-processing. Rhat was equal to 1 for all estimates.

| <b>Pre-processing combination<br/>(detrending method – deseasoning method)</b> | <b>Estimated improvement relative to no pre-processing (median)</b> | <b>Lower 95% credible interval</b> | <b>Upper 95% credible interval</b> | <b>Effective sample size</b> |
|--------------------------------------------------------------------------------|---------------------------------------------------------------------|------------------------------------|------------------------------------|------------------------------|
| linear-none                                                                    | 0.022                                                               | -0.281                             | 0.326                              | 4404.74                      |
| loess-none                                                                     | -0.029                                                              | -0.336                             | 0.278                              | 4645.2                       |
| gaussian-none                                                                  | -0.04                                                               | -0.349                             | 0.271                              | 4485.97                      |
| none-average                                                                   | 0.022                                                               | -0.287                             | 0.338                              | 4698.69                      |
| none-decomposition                                                             | 0.05                                                                | -0.256                             | 0.368                              | 4436.14                      |
| none-stl                                                                       | -0.018                                                              | -0.32                              | 0.295                              | 4483.88                      |
| linear-average                                                                 | 0.009                                                               | -0.299                             | 0.311                              | 4497.63                      |
| loess-average                                                                  | 0.035                                                               | -0.274                             | 0.341                              | 4496.95                      |
| gaussian-average                                                               | 0.023                                                               | -0.282                             | 0.339                              | 4616.81                      |
| linear-decomposition                                                           | 0.037                                                               | -0.273                             | 0.345                              | 4429.23                      |
| loess-decomposition                                                            | 0.009                                                               | -0.296                             | 0.315                              | 4933.83                      |
| gaussian-decomposition                                                         | 0.011                                                               | -0.298                             | 0.324                              | 4567.6                       |
| linear-stl                                                                     | 0.079                                                               | -0.223                             | 0.39                               | 4381.49                      |
| loess-stl                                                                      | 0.025                                                               | -0.282                             | 0.336                              | 4682.63                      |
| gaussian-stl                                                                   | 0.041                                                               | -0.271                             | 0.346                              | 4460.24                      |

**Table S4.** Coefficient estimates for influence of each data pre-processing technique on expanding window univariate early warning signal classification ability relative to assessments made on the raw data. Each estimate is therefore the relative improvement of that factor level versus the none-none data pre-processing. Rhat was equal to 1 for all estimates.

| <b>Pre-processing combination<br/>(detrending method – deseasoning method)</b> | <b>Estimated improvement relative to no pre-processing (median)</b> | <b>Lower 95% credible interval</b> | <b>Upper 95% credible interval</b> | <b>Effective sample size</b> |
|--------------------------------------------------------------------------------|---------------------------------------------------------------------|------------------------------------|------------------------------------|------------------------------|
| linear-none                                                                    | 0.022                                                               | -0.191                             | 0.225                              | 4862.99                      |
| loess-none                                                                     | -0.011                                                              | -0.219                             | 0.188                              | 4243.27                      |
| gaussian-none                                                                  | -0.047                                                              | -0.261                             | 0.156                              | 4358.7                       |
| none-average                                                                   | -0.101                                                              | -0.309                             | 0.111                              | 4425.74                      |
| none-decomposition                                                             | 0.156                                                               | -0.053                             | 0.372                              | 4881.34                      |
| none-stl                                                                       | -0.082                                                              | -0.285                             | 0.129                              | 4688.05                      |
| linear-average                                                                 | -0.023                                                              | -0.231                             | 0.182                              | 4641.8                       |
| loess-average                                                                  | -0.005                                                              | -0.21                              | 0.2                                | 4752.65                      |
| gaussian-average                                                               | -0.036                                                              | -0.245                             | 0.168                              | 4744.24                      |
| linear-decomposition                                                           | 0.212                                                               | 0.003                              | 0.417                              | 4765.92                      |
| loess-decomposition                                                            | 0.146                                                               | -0.065                             | 0.354                              | 4436.74                      |
| gaussian-decomposition                                                         | 0.11                                                                | -0.093                             | 0.32                               | 5118.86                      |
| linear-stl                                                                     | -0.009                                                              | -0.211                             | 0.207                              | 4635.29                      |
| loess-stl                                                                      | 0.005                                                               | -0.2                               | 0.211                              | 4744.39                      |
| gaussian-stl                                                                   | 0.01                                                                | -0.196                             | 0.221                              | 4525.97                      |

**Table S5.** Coefficient estimates for influence of each data pre-processing technique on rolling window multivariate early warning signal classification ability relative to assessments made on the raw data. Each estimate is therefore the relative improvement of that factor level versus the none-none data pre-processing. Rhat was equal to 1 for all estimates.

| <b>Pre-processing combination<br/>(detrending method – deseasoning method)</b> | <b>Estimated improvement relative to no pre-processing (median)</b> | <b>Lower 95% credible interval</b> | <b>Upper 95% credible interval</b> | <b>Effective sample size</b> |
|--------------------------------------------------------------------------------|---------------------------------------------------------------------|------------------------------------|------------------------------------|------------------------------|
| linear-none                                                                    | 0.109                                                               | -0.42                              | 0.647                              | 5858.11                      |
| loess-none                                                                     | 0.155                                                               | -0.377                             | 0.692                              | 5716.95                      |
| gaussian-none                                                                  | 0.198                                                               | -0.344                             | 0.729                              | 5788.42                      |
| none-average                                                                   | -0.375                                                              | -0.912                             | 0.164                              | 5913.66                      |
| none-decomposition                                                             | -0.291                                                              | -0.839                             | 0.245                              | 5769.71                      |
| none-stl                                                                       | -0.194                                                              | -0.713                             | 0.332                              | 5565.13                      |
| linear-average                                                                 | -0.199                                                              | -0.736                             | 0.321                              | 5946.3                       |
| loess-average                                                                  | -0.068                                                              | -0.602                             | 0.467                              | 5412.68                      |
| gaussian-average                                                               | -0.071                                                              | -0.6                               | 0.458                              | 5879.94                      |
| linear-decomposition                                                           | -0.069                                                              | -0.592                             | 0.473                              | 5625.25                      |
| loess-decomposition                                                            | -0.07                                                               | -0.599                             | 0.464                              | 5662.73                      |
| gaussian-decomposition                                                         | 0.149                                                               | -0.367                             | 0.7                                | 5808.23                      |
| linear-stl                                                                     | -0.021                                                              | -0.539                             | 0.495                              | 5721.08                      |
| loess-stl                                                                      | 0.063                                                               | -0.477                             | 0.6                                | 5753.3                       |
| gaussian-stl                                                                   | -0.021                                                              | -0.576                             | 0.504                              | 5879.66                      |

**Table S6.** Coefficient estimates for influence of each data pre-processing technique on expanding window multivariate early warning signal classification ability relative to assessments made on the raw data. Each estimate is therefore the relative improvement of that factor level versus the none-none data pre-processing. Rhat was equal to 1 for all estimates.

| <b>Pre-processing combination<br/>(detrending method – deseasoning method)</b> | <b>Estimated improvement relative to no pre-processing (median)</b> | <b>Lower 95% credible interval</b> | <b>Upper 95% credible interval</b> | <b>Effective sample size</b> |
|--------------------------------------------------------------------------------|---------------------------------------------------------------------|------------------------------------|------------------------------------|------------------------------|
| linear-none                                                                    | -0.056                                                              | -0.587                             | 0.449                              | 5655.71                      |
| loess-none                                                                     | -0.014                                                              | -0.529                             | 0.504                              | 4873.96                      |
| gaussian-none                                                                  | 0.114                                                               | -0.412                             | 0.647                              | 4887.66                      |
| none-average                                                                   | -0.101                                                              | -0.633                             | 0.422                              | 5474.2                       |
| none-decomposition                                                             | 0.114                                                               | -0.4                               | 0.63                               | 5160.85                      |
| none-stl                                                                       | -0.101                                                              | -0.62                              | 0.431                              | 4805.72                      |
| linear-average                                                                 | -0.102                                                              | -0.627                             | 0.413                              | 4637.09                      |
| loess-average                                                                  | -0.106                                                              | -0.632                             | 0.415                              | 5453.8                       |
| gaussian-average                                                               | 0.203                                                               | -0.309                             | 0.736                              | 5393.85                      |
| linear-decomposition                                                           | -0.27                                                               | -0.784                             | 0.256                              | 4786.78                      |
| loess-decomposition                                                            | -0.407                                                              | -0.928                             | 0.117                              | 4535.2                       |
| gaussian-decomposition                                                         | 0.026                                                               | -0.492                             | 0.544                              | 5009.93                      |
| linear-stl                                                                     | -0.06                                                               | -0.592                             | 0.442                              | 5226.99                      |
| loess-stl                                                                      | -0.226                                                              | -0.748                             | 0.294                              | 5430.75                      |
| gaussian-stl                                                                   | 0.119                                                               | -0.402                             | 0.649                              | 4725.75                      |

**Table S7.** Coefficient estimates for influence of each data pre-processing technique on machine learning univariate early warning signal classification ability relative to assessments made on the raw data. Each estimate is therefore the relative improvement of that factor level versus the none-none data pre-processing. Rhat was equal to 1 for all estimates.

| <b>Pre-processing combination<br/>(detrending method – deseasoning method)</b> | <b>Estimated improvement relative to no pre-processing (median)</b> | <b>Lower 95% credible interval</b> | <b>Upper 95% credible interval</b> | <b>Effective sample size</b> |
|--------------------------------------------------------------------------------|---------------------------------------------------------------------|------------------------------------|------------------------------------|------------------------------|
| linear-none                                                                    | 0.074                                                               | -0.302                             | 0.444                              | 4107.36                      |
| loess-none                                                                     | 0.167                                                               | -0.198                             | 0.538                              | 4735.59                      |
| gaussian-none                                                                  | 0.206                                                               | -0.148                             | 0.573                              | 5220.93                      |
| none-average                                                                   | -0.023                                                              | -0.388                             | 0.337                              | 4872.58                      |
| none-decomposition                                                             | -0.126                                                              | -0.494                             | 0.246                              | 4679.61                      |
| none-stl                                                                       | -0.089                                                              | -0.464                             | 0.288                              | 4635.03                      |
| linear-average                                                                 | 0.093                                                               | -0.277                             | 0.459                              | 4766.82                      |
| loess-average                                                                  | 0.07                                                                | -0.3                               | 0.439                              | 4796.65                      |
| gaussian-average                                                               | 0.172                                                               | -0.204                             | 0.542                              | 4708.95                      |
| linear-decomposition                                                           | 0.095                                                               | -0.286                             | 0.462                              | 5137.04                      |
| loess-decomposition                                                            | 0.011                                                               | -0.343                             | 0.383                              | 4863.16                      |
| gaussian-decomposition                                                         | 0.093                                                               | -0.282                             | 0.466                              | 4922.87                      |
| linear-stl                                                                     | -0.19                                                               | -0.546                             | 0.196                              | 5022.74                      |
| loess-stl                                                                      | -0.005                                                              | -0.385                             | 0.366                              | 4858.9                       |
| gaussian-stl                                                                   | -0.006                                                              | -0.383                             | 0.363                              | 4974.07                      |

**Table S8.** Raw coefficient estimates for the influence of each early warning signal computational approach on correct classification of the monthly lake plankton dataset. Rhat was equal to 1 for all estimates.

| <b>Computation method</b> | <b>Coefficient estimate (median)</b> | <b>Lower 95% credible interval</b> | <b>Upper 95% credible interval</b> | <b>Effective sample size</b> |
|---------------------------|--------------------------------------|------------------------------------|------------------------------------|------------------------------|
| univariate_rolling        | 0.01                                 | -0.828                             | 0.823                              | 5547.13                      |
| univariate_expanding      | 0.287                                | -0.543                             | 1.077                              | 5586.69                      |
| EWSNet                    | -0.364                               | -1.205                             | 0.444                              | 5571.98                      |
| multivariate_rolling      | -0.109                               | -0.97                              | 0.718                              | 5684.71                      |
| multivariate_expanding    | 0.372                                | -0.492                             | 1.202                              | 5815.47                      |



**Table S9.** Raw coefficient estimates for the influence of each early warning signal computational approach on correct classification of the yearly lake plankton dataset.  $R^2$  was equal to 1 for all estimates.

| <b>Computation method</b> | <b>Coefficient estimate (median)</b> | <b>Lower 95% credible interval</b> | <b>Upper 95% credible interval</b> | <b>Effective sample size</b> |
|---------------------------|--------------------------------------|------------------------------------|------------------------------------|------------------------------|
| univariate_rolling        | -0.897                               | -1.855                             | 0.038                              | 6679.26                      |
| univariate_expanding      | 0.722                                | -0.215                             | 1.665                              | 6733.57                      |
| EWSNet                    | -0.377                               | -1.332                             | 0.568                              | 6764.95                      |
| multivariate_rolling      | -0.584                               | -1.551                             | 0.38                               | 6720.27                      |
| multivariate_expanding    | 0.884                                | -0.105                             | 1.864                              | 6839.85                      |

**Table S10.** Raw coefficient estimates for the influence of each early warning signal indicator on the correct classification of transitioning monthly lake plankton data. Rhat was equal to 1 for all estimates.

| Early warning signal indicator | Coefficient estimate (median) | Lower 95% credible interval | Upper 95% credible interval | Effective sample size |
|--------------------------------|-------------------------------|-----------------------------|-----------------------------|-----------------------|
| ar1 + SD + skew_expanding      | -0.101                        | -1.065                      | 0.91                        | 5699.4                |
| ar1 + SD_expanding             | 0.123                         | -0.807                      | 1.112                       | 6556.57               |
| ar1 + skew_expanding           | -0.443                        | -1.427                      | 0.56                        | 6614.13               |
| ar1_expanding                  | 0.014                         | -0.968                      | 1.004                       | 6654.9                |
| ar1_rolling                    | 0.278                         | -0.862                      | 1.376                       | 6881.43               |
| eigenCOV_expanding             | 0.125                         | -1.603                      | 1.811                       | 7284.44               |
| eigenCOV_rolling               | 1.206                         | -0.513                      | 3.046                       | 7559.88               |
| eigenMAF_expanding             | 0.126                         | -1.573                      | 1.824                       | 7211.93               |
| eigenMAF_rolling               | 0.487                         | -1.174                      | 2.217                       | 7187.18               |
| mafAR_expanding                | 0.129                         | -1.569                      | 1.803                       | 7419.59               |
| mafAR_rolling                  | -0.183                        | -1.849                      | 1.451                       | 7307                  |
| mafSD_expanding                | -0.573                        | -2.306                      | 1.136                       | 7378.08               |
| mafSD_rolling                  | 1.23                          | -0.465                      | 3.12                        | 6619.4                |
| maxAR_expanding                | 0.812                         | -0.881                      | 2.555                       | 7038.13               |
| maxAR_rolling                  | -0.862                        | -2.57                       | 0.812                       | 7142.18               |
| maxCOV_expanding               | 0.103                         | -1.589                      | 1.802                       | 7043.55               |
| maxCOV_rolling                 | 0.475                         | -1.174                      | 2.174                       | 7474.18               |
| maxSD_expanding                | -0.595                        | -2.36                       | 1.084                       | 6843.76               |
| maxSD_rolling                  | -1.556                        | -3.321                      | 0.129                       | 7216.39               |
| meanAR_expanding               | 0.127                         | -1.583                      | 1.803                       | 6829.76               |
| meanAR_rolling                 | 0.523                         | -1.115                      | 2.249                       | 7479.18               |
| meanSD_expanding               | 0.114                         | -1.608                      | 1.821                       | 7296.07               |
| meanSD_rolling                 | -0.855                        | -2.556                      | 0.836                       | 7170.59               |
| mutlINFO_expanding             | -1.33                         | -3.308                      | 0.367                       | 7121.51               |
| mutlINFO_rolling               | -0.168                        | -1.802                      | 1.486                       | 7240.02               |
| pcaAR_expanding                | 0.123                         | -1.569                      | 1.813                       | 7205.42               |
| pcaAR_rolling                  | -0.187                        | -1.882                      | 1.489                       | 6942.3                |
| pcaSD_expanding                | 0.114                         | -1.551                      | 1.793                       | 7363.32               |
| pcaSD_rolling                  | 1.225                         | -0.491                      | 3.103                       | 7330.97               |
| scaled_ML                      | -1.953                        | -3.372                      | -0.718                      | 7250.73               |
| SD + skew_expanding            | -0.453                        | -1.418                      | 0.542                       | 6682.21               |
| SD_expanding                   | 0.138                         | -0.817                      | 1.131                       | 6549.57               |
| SD_rolling                     | -0.312                        | -1.402                      | 0.814                       | 7039.61               |
| skew_expanding                 | -0.464                        | -1.441                      | 0.538                       | 6941.92               |
| skew_rolling                   | -0.188                        | -1.28                       | 0.94                        | 6865.29               |
| unscaled_ML                    | 2.5                           | 1.109                       | 3.964                       | 7196.14               |

**Table S11.** Raw coefficient estimates for the influence of each early warning signal indicator on the correct classification of transitioning yearly lake plankton data. Rhat was equal to 1 for all estimates.

| Early warning signal indicator | Coefficient estimate (median) | Lower 95% credible interval | Upper 95% credible interval | Effective sample size |
|--------------------------------|-------------------------------|-----------------------------|-----------------------------|-----------------------|
| ar1 + SD_expanding             | -0.518                        | -2.221                      | 0.991                       | 6839.06               |
| ar1 + skew_expanding           | -0.533                        | -2.189                      | 0.985                       | 7186.25               |
| ar1_expanding                  | -1.151                        | -3.048                      | 0.562                       | 6360.64               |
| ar1_rolling                    | -0.078                        | -1.5                        | 1.292                       | 7120.56               |
| eigenCOV_expanding             | -0.404                        | -2.538                      | 1.635                       | 7119.7                |
| eigenCOV_rolling               | 0.831                         | -0.841                      | 2.569                       | 7084.94               |
| eigenMAF_expanding             | -0.402                        | -2.593                      | 1.617                       | 7401.32               |
| eigenMAF_rolling               | 0.838                         | -0.886                      | 2.597                       | 7083.83               |
| mafAR_expanding                | 0.626                         | -1.345                      | 2.469                       | 6715.11               |
| mafAR_rolling                  | 0.165                         | -1.52                       | 1.837                       | 7417.58               |
| mafSD_expanding                | 1.484                         | -0.419                      | 3.313                       | 7250.88               |
| mafSD_rolling                  | 0.166                         | -1.543                      | 1.82                        | 7525.29               |
| maxAR_expanding                | 0.609                         | -1.334                      | 2.47                        | 7176.4                |
| maxAR_rolling                  | -0.541                        | -2.274                      | 1.158                       | 7202.81               |
| maxCOV_expanding               | -0.4                          | -2.574                      | 1.577                       | 7187.44               |
| maxCOV_rolling                 | 0.831                         | -0.888                      | 2.563                       | 7621.39               |
| maxSD_expanding                | -0.401                        | -2.559                      | 1.58                        | 6985.81               |
| maxSD_rolling                  | -0.54                         | -2.277                      | 1.189                       | 7306.98               |
| meanAR_expanding               | -0.411                        | -2.567                      | 1.605                       | 7144.62               |
| meanAR_rolling                 | 0.167                         | -1.556                      | 1.812                       | 7007.18               |
| meanSD_expanding               | -0.384                        | -2.594                      | 1.6                         | 7208.06               |
| meanSD_rolling                 | -0.539                        | -2.309                      | 1.178                       | 7219                  |
| mutINFO_expanding              | -0.389                        | -2.52                       | 1.573                       | 7087.32               |
| mutINFO_rolling                | -1.293                        | -3.194                      | 0.41                        | 7394.37               |
| pcaAR_expanding                | -0.375                        | -2.58                       | 1.601                       | 6952.42               |
| pcaAR_rolling                  | -0.555                        | -2.297                      | 1.106                       | 7038.82               |
| pcaSD_expanding                | -0.389                        | -2.544                      | 1.623                       | 7548.03               |
| pcaSD_rolling                  | 0.82                          | -0.874                      | 2.6                         | 7083.83               |
| scaled_ML                      | -2.398                        | -4.212                      | -0.67                       | 6758.17               |
| SD + skew_expanding            | 0.341                         | -1.098                      | 1.69                        | 7227.53               |
| SD_expanding                   | 0.343                         | -1.101                      | 1.701                       | 6977.24               |
| SD_rolling                     | 0.155                         | -1.309                      | 1.542                       | 7236.72               |
| skew_expanding                 | 0.321                         | -1.108                      | 1.715                       | 7500.49               |
| skew_rolling                   | 0.26                          | -1.172                      | 1.622                       | 6755.08               |
| unscaled_ML                    | 2.011                         | 0.307                       | 3.697                       | 6940.17               |

**Table S12.** Raw coefficient estimates for the influence of each early warning signal indicator on the correct classification of non-transitioning monthly lake plankton data. Rhat was equal to 1 for all estimates.

| Early warning signal indicator | Coefficient estimate (median) | Lower 95% credible interval | Upper 95% credible interval | Effective sample size |
|--------------------------------|-------------------------------|-----------------------------|-----------------------------|-----------------------|
| ar1 + SD_expanding             | 0.024                         | -0.903                      | 0.781                       | 4124.16               |
| ar1 + skew_expanding           | 0.767                         | -0.144                      | 1.538                       | 3783.99               |
| ar1_expanding                  | 0.307                         | -0.614                      | 1.063                       | 4152.73               |
| ar1_rolling                    | 0.108                         | -1.024                      | 1.083                       | 6285.93               |
| eigenCOV_expanding             | 0.845                         | -0.434                      | 2.285                       | 6389.6                |
| eigenCOV_rolling               | -0.581                        | -1.728                      | 0.518                       | 7082.21               |
| eigenMAF_expanding             | -0.378                        | -1.544                      | 0.784                       | 6108.65               |
| eigenMAF_rolling               | -0.059                        | -1.164                      | 1.071                       | 7271.97               |
| mafAR_expanding                | -0.363                        | -1.568                      | 0.848                       | 6487.17               |
| mafAR_rolling                  | -0.053                        | -1.191                      | 1.059                       | 7028.66               |
| mafSD_expanding                | -0.891                        | -2.053                      | 0.297                       | 6050.84               |
| mafSD_rolling                  | -0.585                        | -1.697                      | 0.528                       | 6910.91               |
| maxAR_expanding                | -0.38                         | -1.566                      | 0.826                       | 6352.85               |
| maxAR_rolling                  | -0.07                         | -1.186                      | 1.056                       | 6830.69               |
| maxCOV_expanding               | -0.111                        | -1.287                      | 1.099                       | 6405.66               |
| maxCOV_rolling                 | -0.316                        | -1.484                      | 0.786                       | 7160.19               |
| maxSD_expanding                | 0.162                         | -1.05                       | 1.407                       | 6410.5                |
| maxSD_rolling                  | 0.732                         | -0.413                      | 1.909                       | 7128.34               |
| meanAR_expanding               | 1.27                          | -0.103                      | 2.827                       | 6754.02               |
| meanAR_rolling                 | -0.303                        | -1.45                       | 0.816                       | 6981.3                |
| meanSD_expanding               | -0.368                        | -1.559                      | 0.831                       | 5843.92               |
| meanSD_rolling                 | 1.377                         | 0.152                       | 2.725                       | 6999.22               |
| mutlINFO_expanding             | 1.782                         | 0.319                       | 3.503                       | 6973.31               |
| mutlINFO_rolling               | 0.179                         | -0.914                      | 1.343                       | 6927.06               |
| pcaAR_expanding                | 0.487                         | -0.756                      | 1.774                       | 6604.05               |
| pcaAR_rolling                  | 0.452                         | -0.666                      | 1.617                       | 6921.03               |
| pcaSD_expanding                | 0.837                         | -0.467                      | 2.238                       | 5502.2                |
| pcaSD_rolling                  | -0.563                        | -1.746                      | 0.558                       | 6735.44               |
| scaled_ML                      | 1.226                         | 0.113                       | 2.389                       | 6992.78               |
| SD + skew_expanding            | 0.374                         | -0.551                      | 1.135                       | 4091.32               |
| SD_expanding                   | -0.276                        | -1.194                      | 0.499                       | 4015.75               |
| SD_rolling                     | 0.431                         | -0.673                      | 1.415                       | 6261.03               |
| skew_expanding                 | 0.828                         | -0.094                      | 1.612                       | 4259.85               |
| skew_rolling                   | 0.124                         | -0.986                      | 1.075                       | 6312                  |
| unscaled_ML                    | -1.412                        | -2.547                      | -0.24                       | 6962.31               |

**Table S13.** Raw coefficient estimates for the influence of each early warning signal indicator on the correct classification of non-transitioning yearly lake plankton data. Rhat was equal to 1 for all estimates.

| Early warning signal indicator | Coefficient estimate (median) | Lower 95% credible interval | Upper 95% credible interval | Effective sample size |
|--------------------------------|-------------------------------|-----------------------------|-----------------------------|-----------------------|
| ar1 + SD_expanding             | -0.037                        | -0.999                      | 0.926                       | 6441.52               |
| ar1 + skew_expanding           | 0.382                         | -0.619                      | 1.366                       | 6465.21               |
| ar1_expanding                  | -0.116                        | -1.066                      | 0.848                       | 6473.86               |
| ar1_rolling                    | -0.297                        | -1.583                      | 1.01                        | 6755.38               |
| eigenCOV_expanding             | 0.564                         | -1.275                      | 2.659                       | 6898.07               |
| eigenCOV_rolling               | -0.449                        | -1.663                      | 0.779                       | 6817.43               |
| eigenMAF_expanding             | 0.57                          | -1.273                      | 2.675                       | 7059.78               |
| eigenMAF_rolling               | 0.1                           | -1.091                      | 1.322                       | 7481.42               |
| mafAR_expanding                | -1.572                        | -3.081                      | 0.08                        | 7372.55               |
| mafAR_rolling                  | -0.16                         | -1.337                      | 1.026                       | 6774.67               |
| mafSD_expanding                | -0.302                        | -2.068                      | 1.52                        | 7182.36               |
| mafSD_rolling                  | -1.01                         | -2.256                      | 0.194                       | 6888.93               |
| maxAR_expanding                | -0.33                         | -2.032                      | 1.62                        | 6821.15               |
| maxAR_rolling                  | 1.011                         | -0.243                      | 2.312                       | 7242.09               |
| maxCOV_expanding               | 0.581                         | -1.29                       | 2.663                       | 7160.89               |
| maxCOV_rolling                 | -0.435                        | -1.693                      | 0.728                       | 7186.74               |
| maxSD_expanding                | 0.563                         | -1.315                      | 2.625                       | 7363.51               |
| maxSD_rolling                  | 1.736                         | 0.404                       | 3.229                       | 6380.13               |
| meanAR_expanding               | -0.308                        | -2.03                       | 1.581                       | 7132.62               |
| meanAR_rolling                 | 0.388                         | -0.801                      | 1.638                       | 7136.08               |
| meanSD_expanding               | -0.319                        | -1.983                      | 1.582                       | 7150                  |
| meanSD_rolling                 | 1.338                         | 0.076                       | 2.735                       | 7260.66               |
| mutlINFO_expanding             | 0.596                         | -1.326                      | 2.668                       | 7558.13               |
| mutlINFO_rolling               | -2.519                        | -4.065                      | -1.097                      | 7382.04               |
| pcaAR_expanding                | 0.588                         | -1.302                      | 2.645                       | 6587.8                |
| pcaAR_rolling                  | 0.386                         | -0.827                      | 1.643                       | 7164.39               |
| pcaSD_expanding                | 0.555                         | -1.286                      | 2.651                       | 7363.95               |
| pcaSD_rolling                  | -0.442                        | -1.656                      | 0.745                       | 6794.44               |
| scaled_ML                      | 3.496                         | 1.78                        | 5.066                       | 6548.54               |
| SD + skew_expanding            | -0.265                        | -1.198                      | 0.696                       | 6487.91               |
| SD_expanding                   | 0.229                         | -0.739                      | 1.231                       | 6386.85               |
| SD_rolling                     | 0.298                         | -0.977                      | 1.603                       | 6704.27               |
| skew_expanding                 | 0.703                         | -0.261                      | 1.687                       | 6547.69               |
| skew_rolling                   | -0.052                        | -1.334                      | 1.248                       | 6792.27               |
| unscaled_ML                    | -2.796                        | -4.467                      | -1.21                       | 6776.58               |
